# Supplementary material
Source: publisher figshare collection journal article supplement (https://acs.figshare.com/ndownloader/files/23364065)
Supplement: Supplementary file 1 [file 23364065]

## Supporting Information

### **Lipid compositions in infant formulas affect the solubilisation of antimalarial drugs artefenomel (OZ439) and ferroquine during digestion**

Malinda Salim,<sup>1</sup> Gisela Ramirez,<sup>1</sup> Kang-Yu Peng,<sup>1</sup> Andrew J. Clulow,<sup>1</sup> Adrian Hawley,<sup>2</sup>  
Hanu Ramachandruni,<sup>3</sup> Stephane Beilles,<sup>4</sup> and Ben J. Boyd<sup>1,5\*</sup>

<sup>1</sup>Drug Delivery, Disposition and Dynamics, Monash Institute of Pharmaceutical Sciences,  
Monash, 381 Royal Parade, Parkville, VIC 3052, Australia

<sup>2</sup>SAXS/WAXS beamline, Australian Synchrotron, ANSTO, 800 Blackburn Rd, Clayton, VIC  
3169, Australia

<sup>3</sup>Medicines for Malaria Venture, 20, Route de Pré-Bois, 1215 Geneva 15, Switzerland

<sup>4</sup>Sanofi R&D, 371 Rue du Professeur Blayac, 34080 Montpellier, France

<sup>5</sup>ARC Centre of Excellence in Convergent Bio-Nano Science and Technology, Monash  
Institute of Pharmaceutical Sciences, Monash University (Parkville Campus), 381 Royal  
Parade, Parkville, VIC 3052, Australia

\*Corresponding author details:

Postal Address: Monash Institute of Pharmaceutical Sciences, Monash University (Parkville  
Campus), 381 Royal Parade, Parkville, VIC 3052, Australia

Telephone: +61 3 99039112; Fax: +61 3 99039583

Email: [ben.boyd@monash.edu](mailto:ben.boyd@monash.edu)



**Table S1.** Nutritional information of milk and the three infant formulas (IF 1, IF 2 and IF 3) used in this study per 100 mL, with reconstitution of 15.0 g powder (IF 1), 14.0 g powder (IF 2) and 14.6 g powder (IF3).

| Nutritional information | Quantity per 100 mL |       |        |            |
|-------------------------|---------------------|-------|--------|------------|
|                         | Milk                | IF 1  | IF 2   | IF 3       |
| Total fat               | 3.8 g               | 3.8 g | 3.8 g  | 3.8 g      |
| Saturated fat           | 2.5 g               | 1.5 g | 2.1 g  | Not stated |
| Total protein           | 3.4 g               | 1.6 g | 1.5 g  | 1.8 g      |
| Carbohydrate            | 4.8 g               | 8.8 g | 7.9 g  | 7.4 g      |
| Sodium                  | 40 mg               | 25 mg | 36 mg  | 20 mg      |
| Calcium                 | 115 mg              | 63 mg | 60 mg  | 58 mg      |
| Vitamin A               | 41 µg               | 80 µg | 60 µg  | 66 µg      |
| Riboflavin (vitamin B2) | 200 µg              | 90 µg | 112 µg | 88 µg      |

**Table S2.** Average compositions of the free fatty acids (FA) and monoacylglycerols (MAG) as mol% in milk and infant formulas (IF 1, IF 2 and IF 3) after 30 minutes digestion. The species were identified as FA or MAG (X:Y), with X = fatty acid chain length and Y = degree of unsaturation. SEM was standard error of mean based on 3 replicates.

| Fatty acids | Mol%±SEM   |            |            |            |
|-------------|------------|------------|------------|------------|
|             | Milk       | IF 1       | IF 2       | IF 3       |
| FA (04:0)   | 0.4 ± 0.0  | 0.0 ± 0.0  | 0.0 ± 0.0  | 0.0 ± 0.0  |
| FA (06:0)   | 0.5 ± 0.0  | 0.0 ± 0.0  | 0.0 ± 0.0  | 0.0 ± 0.0  |
| FA (08:0)   | 0.4 ± 0.0  | 0.5 ± 0.1  | 5.3 ± 0.5  | 0.3 ± 0.0  |
| FA (10:0)   | 1.6 ± 0.1  | 1.0 ± 0.1  | 3.5 ± 0.1  | 1.3 ± 0.0  |
| FA (12:0)   | 1.4 ± 0.1  | 1.7 ± 0.1  | 2.0 ± 0.2  | 2.2 ± 0.1  |
| FA (14:0)   | 7.8 ± 0.3  | 3.6 ± 0.3  | 4.6 ± 0.2  | 3.2 ± 0.2  |
| FA (14:1)   | 1.0 ± 0.0  | 0.0 ± 0.0  | 0.0 ± 0.0  | 0.0 ± 0.0  |
| FA (15:0)   | 1.9 ± 0.0  | 0.0 ± 0.0  | 0.1 ± 0.0  | 0.1 ± 0.0  |
| FA (15:1)   | 0.1 ± 0.0  | 0.0 ± 0.0  | 0.0 ± 0.0  | 0.0 ± 0.0  |
| FA (16:0)   | 38.3 ± 2.0 | 31.5 ± 0.6 | 23.9 ± 1.3 | 26.7 ± 1.0 |
| FA (16:1)   | 2.8 ± 0.0  | 0.4 ± 0.0  | 0.2 ± 0.0  | 0.5 ± 0.0  |
| FA (17:0)   | 1.5 ± 0.1  | 0.0 ± 0.0  | 0.1 ± 0.0  | 0.2 ± 0.0  |
| FA (17:1)   | 0.5 ± 0.0  | 0.0 ± 0.0  | 0.0 ± 0.0  | 0.0 ± 0.0  |
| FA (18:0)   | 13.6 ± 1.2 | 5.2 ± 0.4  | 6.0 ± 1.3  | 4.1 ± 0.1  |



| <b>FA (18:1)</b>         | 25.5 ± 0.1      | 32.6 ± 1.7  | 26.0 ± 2.5  | 26.2 ± 1.2  |
|--------------------------|-----------------|-------------|-------------|-------------|
| <b>FA (18:2)</b>         | 2.1 ± 0.0       | 9.9 ± 0.6   | 5.8 ± 0.5   | 7.7 ± 0.5   |
| <b>FA (18:3)</b>         | 0.1 ± 0.0       | 0.2 ± 0.0   | 0.2 ± 0.0   | 0.1 ± 0.0   |
| <b>FA (19:0)</b>         | 0.2 ± 0.0       | 0.0 ± 0.0   | 0.0 ± 0.0   | 0.0 ± 0.0   |
| <b>FA (19:1)</b>         | 0.3 ± 0.0       | 0.0 ± 0.0   | 0.0 ± 0.0   | 0.0 ± 0.0   |
| <b>FA (20:0)</b>         | 0.1 ± 0.0       | 0.1 ± 0.0   | 0.1 ± 0.0   | 0.1 ± 0.0   |
| <b>FA (20:1)</b>         | 0.3 ± 0.0       | 0.4 ± 0.0   | 0.4 ± 0.0   | 0.3 ± 0.0   |
| <b>FA (20:2)</b>         | 0.0 ± 0.0       | 0.0 ± 0.0   | 0.0 ± 0.0   | 0.0 ± 0.0   |
| <b>FA (20:3)</b>         | 0.0 ± 0.0       | 0.0 ± 0.0   | 0.0 ± 0.0   | 0.0 ± 0.0   |
| <b>FA (20:4)</b>         | 0.0 ± 0.0       | 0.0 ± 0.0   | 0.0 ± 0.0   | 0.0 ± 0.0   |
| <b>FA (20:5)</b>         | 0.0 ± 0.0       | 0.0 ± 0.0   | 0.0 ± 0.0   | 0.0 ± 0.0   |
| <b>FA (22:0)</b>         | 0.1 ± 0.0       | 0.2 ± 0.0   | 0.2 ± 0.0   | 0.1 ± 0.0   |
| <b>FA (22:1)</b>         | 0.0 ± 0.0       | 0.0 ± 0.0   | 0.1 ± 0.0   | 0.0 ± 0.0   |
| <b>FA (22:2)</b>         | 0.0 ± 0.0       | 0.0 ± 0.0   | 0.0 ± 0.0   | 0.0 ± 0.0   |
| <b>FA (22:3)</b>         | 0.0 ± 0.0       | 0.0 ± 0.0   | 0.0 ± 0.0   | 0.0 ± 0.0   |
| <b>FA (22:4)</b>         | 0.0 ± 0.0       | 0.0 ± 0.0   | 0.0 ± 0.0   | 0.0 ± 0.0   |
| <b>FA (22:5)</b>         | 0.0 ± 0.0       | 0.0 ± 0.0   | 0.0 ± 0.0   | 0.0 ± 0.0   |
| <b>FA (22:6)</b>         | 0.0 ± 0.0       | 0.0 ± 0.0   | 0.0 ± 0.0   | 0.0 ± 0.0   |
| <b>Monoacylglycerols</b> | <b>Mol%±SEM</b> |             |             |             |
|                          | <b>Milk</b>     | <b>IF 1</b> | <b>IF 2</b> | <b>IF 3</b> |
| <b>MAG (04:0)</b>        | 0.1 ± 0.0       | 0.0 ± 0.0   | 0.1 ± 0.0   | 0.1 ± 0.0   |
| <b>MAG (06:0)</b>        | 0.0 ± 0.0       | 0.0 ± 0.0   | 0.0 ± 0.0   | 0.0 ± 0.0   |
| <b>MAG (08:0)</b>        | 0.1 ± 0.0       | 0.0 ± 0.0   | 1.0 ± 0.1   | 0.0 ± 0.0   |
| <b>MAG (10:0)</b>        | 0.9 ± 0.1       | 0.1 ± 0.0   | 2.1 ± 0.1   | 0.1 ± 0.0   |
| <b>MAG (12:0)</b>        | 2.3 ± 0.3       | 4.2 ± 0.2   | 6.9 ± 0.2   | 2.4 ± 0.2   |
| <b>MAG (14:0)</b>        | 11.7 ± 0.5      | 0.8 ± 0.1   | 1.1 ± 0.1   | 1.0 ± 0.1   |
| <b>MAG (14:1)</b>        | 2.0 ± 0.1       | 0.0 ± 0.0   | 0.0 ± 0.0   | 0.0 ± 0.0   |
| <b>MAG (15:0)</b>        | 0.9 ± 0.1       | 0.0 ± 0.0   | 0.0 ± 0.0   | 0.0 ± 0.0   |
| <b>MAG (15:1)</b>        | 0.3 ± 0.1       | 0.0 ± 0.0   | 0.1 ± 0.1   | 0.0 ± 0.0   |
| <b>MAG (16:0)</b>        | 27.2 ± 3.3      | 1.3 ± 1.2   | 5.1 ± 1.6   | 2.0 ± 1.1   |
| <b>MAG (16:1)</b>        | 5.0 ± 0.3       | 0.1 ± 0.0   | 0.1 ± 0.0   | 0.1 ± 0.0   |
| <b>MAG (17:0)</b>        | 0.4 ± 0.0       | 0.0 ± 0.0   | 0.0 ± 0.0   | 0.0 ± 0.0   |
| <b>MAG (17:1)</b>        | 0.1 ± 0.0       | 0.0 ± 0.0   | 0.0 ± 0.0   | 0.0 ± 0.0   |
| <b>MAG (18:0)</b>        | 0.2 ± 0.1       | 0.0 ± 0.0   | 0.1 ± 0.0   | 0.1 ± 0.1   |
| <b>MAG (18:1)</b>        | 17.2 ± 0.9      | 30.7 ± 2.1  | 26.5 ± 1.4  | 26.1 ± 1.7  |
| <b>MAG (18:2)</b>        | 6.5 ± 0.6       | 32.6 ± 2.1  | 26.4 ± 2.0  | 28.2 ± 1.4  |
| <b>MAG (18:3)</b>        | 4.6 ± 0.5       | 12.1 ± 0.2  | 17.2 ± 2.0  | 4.9 ± 0.6   |
| <b>MAG (19:0)</b>        | 0.6 ± 0.3       | 0.0 ± 0.0   | 0.0 ± 0.0   | 0.0 ± 0.0   |
| <b>MAG (19:1)</b>        | 0.0 ± 0.0       | 0.0 ± 0.0   | 0.0 ± 0.0   | 0.6 ± 0.6   |
| <b>MAG (20:0)</b>        | 0.0 ± 0.0       | 0.0 ± 0.0   | 0.0 ± 0.0   | 0.0 ± 0.0   |
| <b>MAG (20:1)</b>        | 0.0 ± 0.0       | 0.0 ± 0.0   | 0.1 ± 0.0   | 0.1 ± 0.0   |
| <b>MAG (20:2)</b>        | 0.1 ± 0.0       | 0.0 ± 0.0   | 0.0 ± 0.0   | 0.0 ± 0.0   |
| <b>MAG (20:3)</b>        | 0.7 ± 0.1       | 0.1 ± 0.0   | 0.0 ± 0.0   | 0.1 ± 0.0   |
| <b>MAG (20:4)</b>        | 1.2 ± 0.3       | 0.8 ± 0.1   | 0.0 ± 0.0   | 0.2 ± 0.0   |
| <b>MAG (20:5)</b>        | 0.0 ± 0.0       | 0.0 ± 0.0   | 0.0 ± 0.0   | 0.0 ± 0.0   |
| <b>MAG (22:0)</b>        | 0.0 ± 0.0       | 0.0 ± 0.0   | 0.0 ± 0.0   | 0.0 ± 0.0   |
| <b>MAG (22:1)</b>        | 0.0 ± 0.0       | 0.0 ± 0.0   | 0.0 ± 0.0   | 0.0 ± 0.0   |
| <b>MAG (22:2)</b>        | 0.1 ± 0.0       | 0.0 ± 0.0   | 0.0 ± 0.0   | 0.0 ± 0.0   |
| <b>MAG (22:3)</b>        | 0.0 ± 0.0       | 0.0 ± 0.0   | 0.0 ± 0.0   | 0.0 ± 0.0   |
| <b>MAG (22:4)</b>        | 0.3 ± 0.0       | 0.0 ± 0.0   | 0.0 ± 0.0   | 0.1 ± 0.0   |



|                   |               |               |               |               |
|-------------------|---------------|---------------|---------------|---------------|
| <b>MAG (22:5)</b> | $0.1 \pm 0.0$ | $0.1 \pm 0.1$ | $0.5 \pm 0.1$ | $0.1 \pm 0.1$ |
| <b>MAG (22:6)</b> | $0.4 \pm 0.0$ | $4.7 \pm 0.3$ | $0.0 \pm 0.0$ | $0.3 \pm 0.0$ |

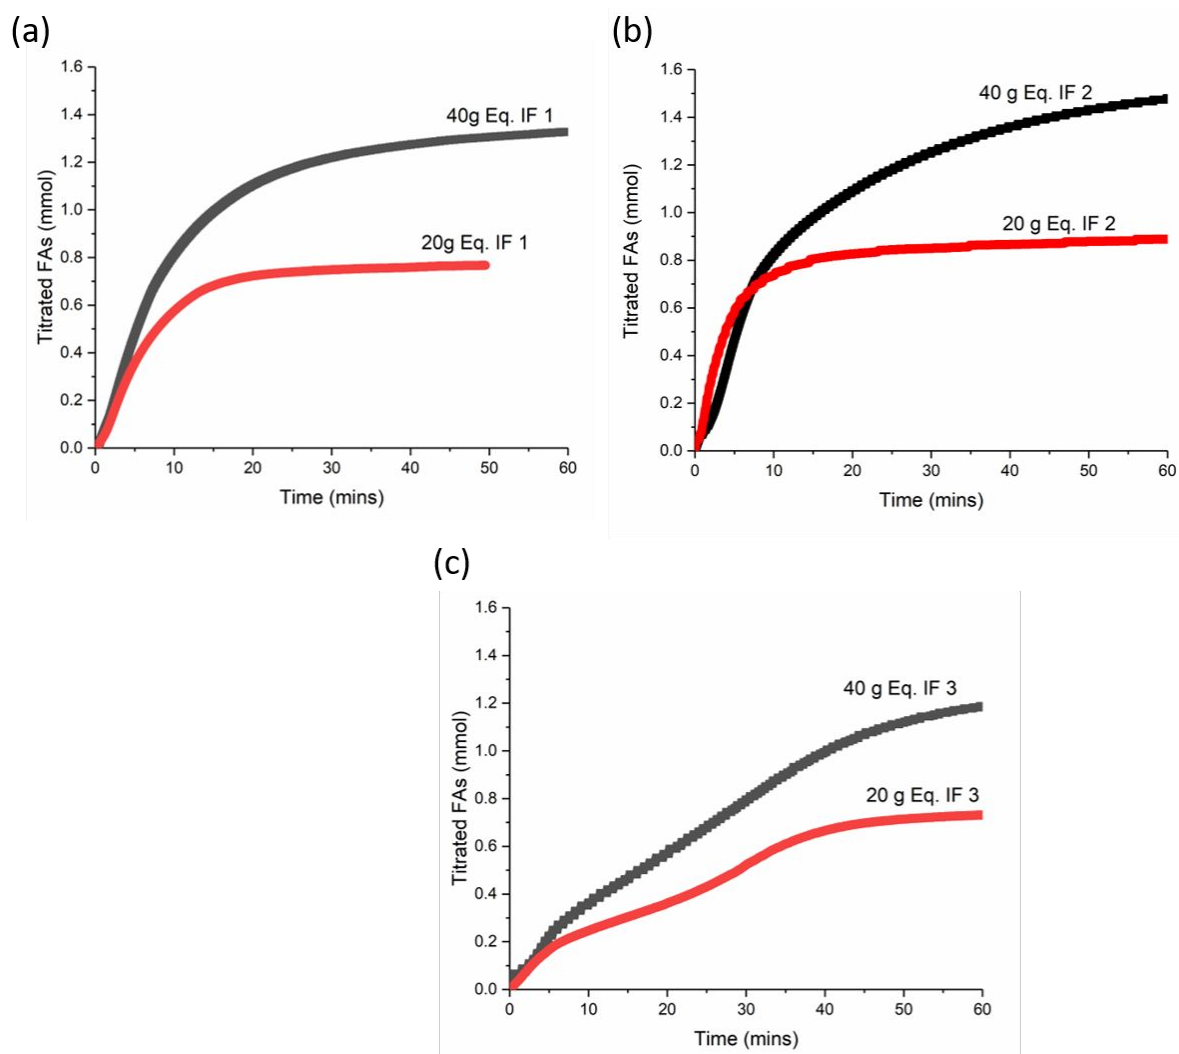

**Figure S1.** Titrated (ionised) fatty acids during digestion of (a) IF 1, (b) IF 2, and (c) IF 3 at pH 6.5 for 20 g Eq. and 40 g Eq. infant formula powders. The gram equivalents were representative of the amount of IF powder required to administer 800 mg of OZ439-FB and 900 mg FQ-FB in a total volume of 200 mL.



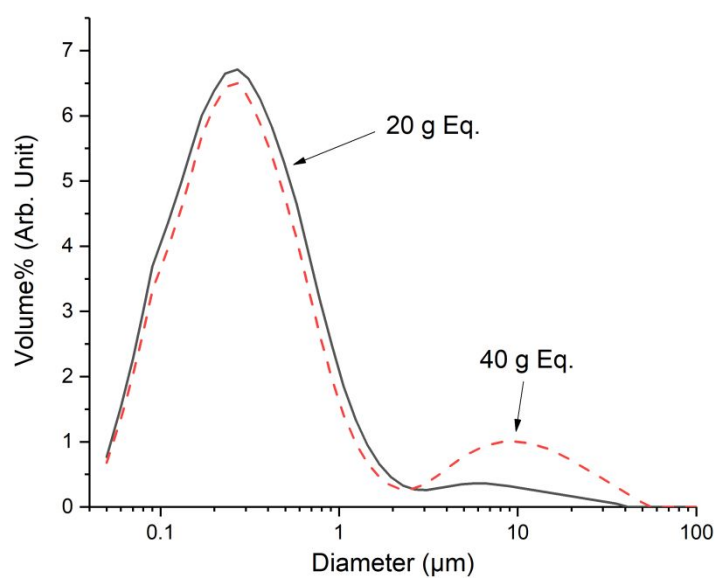

**Figure S2.** Distribution of the particle sizes in 20 g Eq. (2.7% fat) and 40 g Eq. (5.4% fat) IF 2. The gram equivalents were representative of the amount of IF powder required to administer 800 mg of OZ439-FB and 900 mg FQ-FB in a total volume of 200 mL.



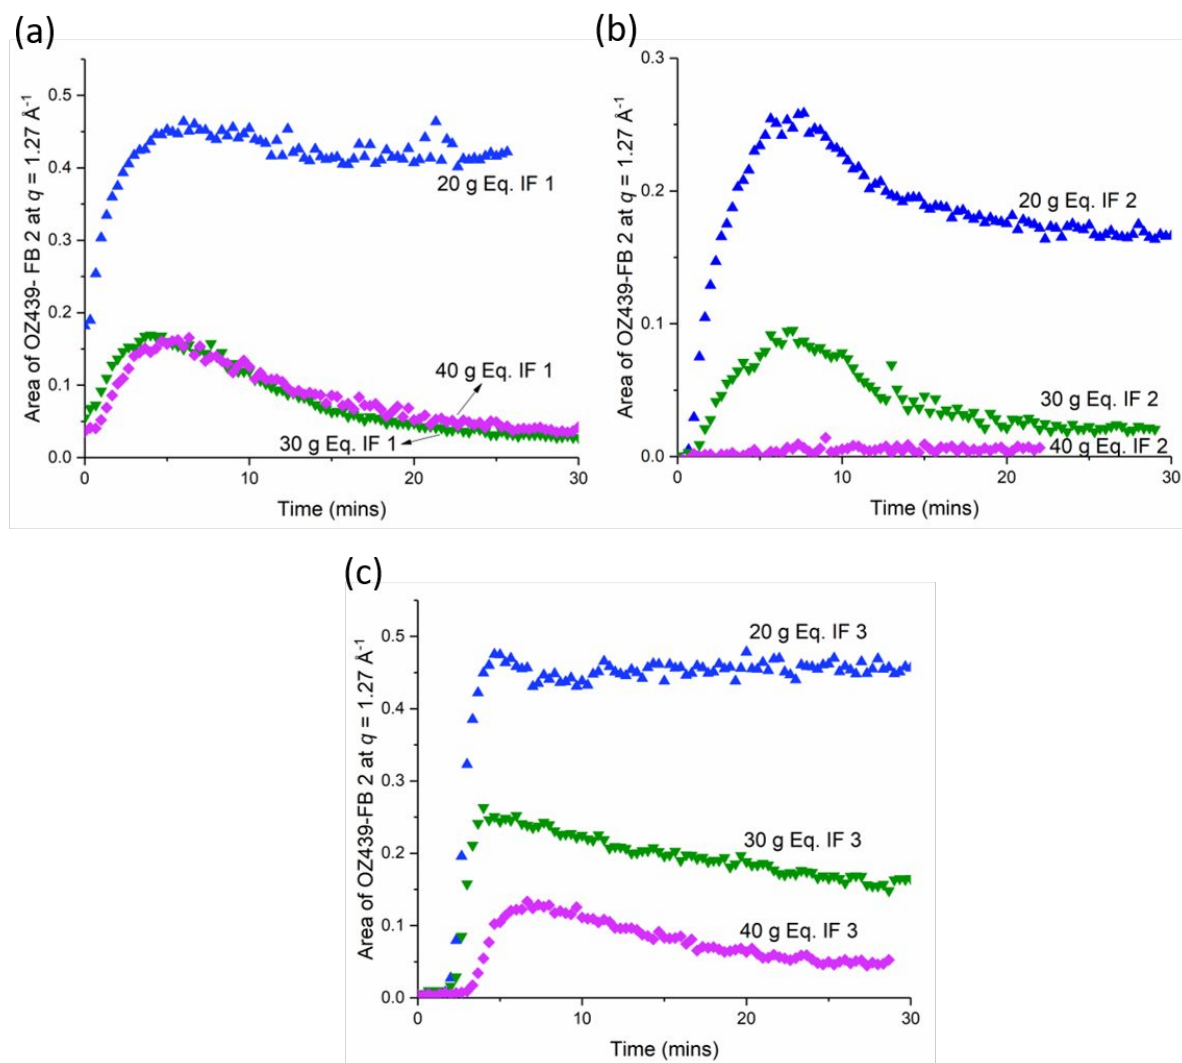

**Figure S3.** Amount of crystalline OZ439-FB 2 present during digestion in (a) IF 1, (b) IF 2 and (c) IF 3 at 20 g, 30 g, and 40 g Eq. powders. The gram equivalents were representative of the amount of IF powder required to administer 800 mg of OZ439-FB and 900 mg FQ-FB in a total volume of 200 mL.



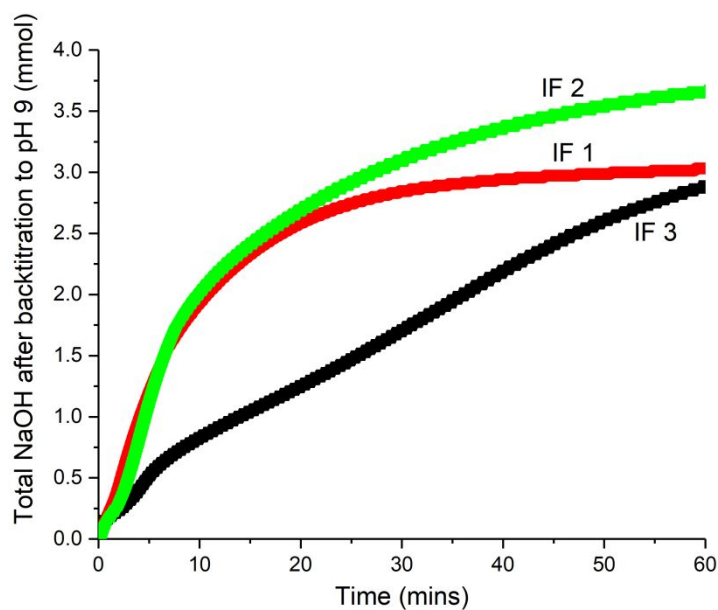

**Figure S4.** Total amount of sodium hydroxide added during forward titration (digestion at pH 6.5) and backtitration to pH 9 after 1 hour lipolysis of infant formulas at 40 g Eq. IF 1, IF 2, and IF 3. The fat contents were 5.1, 5.4, and 5.2% respectively. The gram equivalents were representative of the amount of IF powder required to administer 800 mg of OZ439-FB and 900 mg FQ-FB in a total volume of 200 mL.



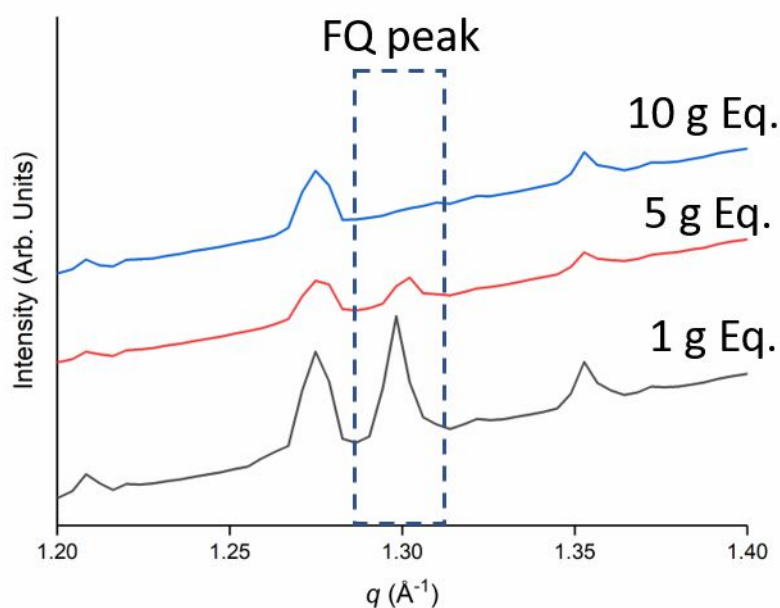

**Figure S5.** Dependence of solubilisation of ferroquine on fat content of IF2 present. X-ray scattering profiles of OZ439+FQ in IF 2 (characteristic peak from FQ in dashed box) at 1 g (0.1% fat), 5 g (0.7% fat), and 10 g (1.4% fat) Eq. IF 2 powder at the end of digestion. The gram equivalents were representative of the amount of IF powder required to administer 800 mg of OZ439-FB and 900 mg FQ-FB in a total volume of 200 mL.

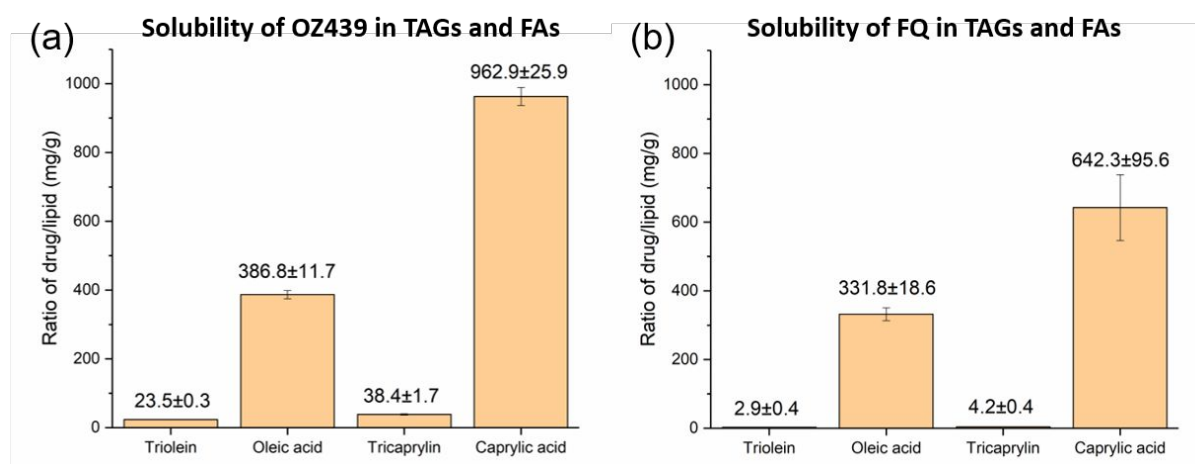

**Figure S6.** Equilibrium solubility of (a) OZ439-FB 2 and (b) FQ-FB in triacylglycerols (triolein and tricaprylin) and fatty acids (oleic acid and caprylic acid) in mg drug/g lipid.



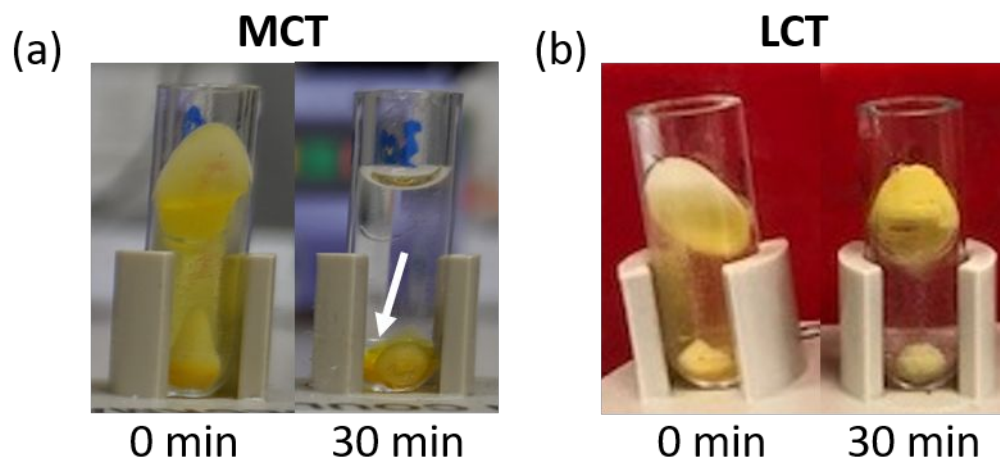

**Figure S7.** Visual observations of the separated digested phases of OZ439+FQ in medium chain triacylglycerols (MCT) and long chain triacylglycerols (LCT) after ultracentrifugation at 0 minute (before digestion) and 30 minutes digestion. Arrow in panel (a) points to a sedimented oily layer.



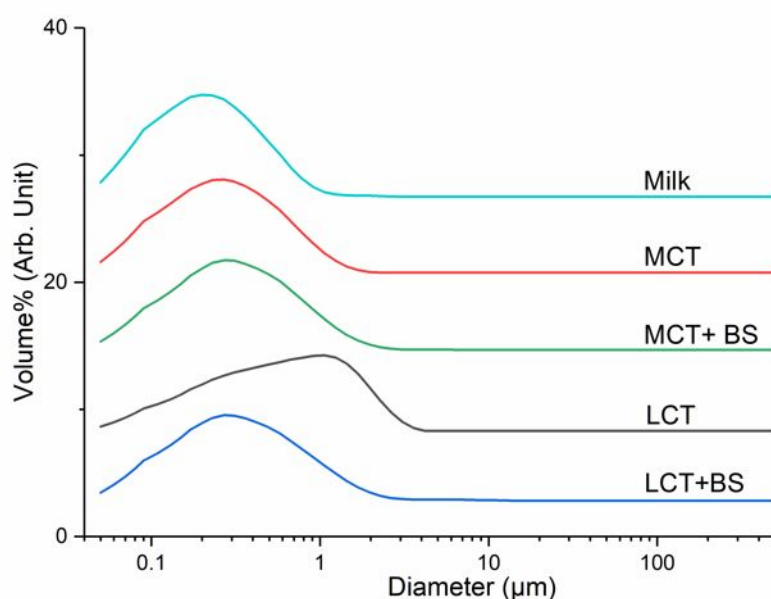

**Figure S8.** Distribution of the particle sizes in milk, medium chain triacylglycerols (MCT), and long chain triacylglycerols (LCT) and the lipid emulsions in presence of bile salts (BS).

**Table S3.** Effects of bile salts (NaTDC/DOPC) on the amount of sodium hydroxide added during forward titration (digestion at pH 6.5) and forward + back titration (digestion at pH 6.5 and pH increment to 9) after 1 hr digestion of OZ439+FQ in medium chain – and long chain triacylglycerols. The amount NaOH added have been subtracted from the blank digestions to account for titrated volumes from the MFGM emulsifier, pancreatin, and the drugs.

| Formulation | Digestion media    | NaOH added in forward titration at pH 6.5 (mmol) | Total NaOH added: forward + back titration to pH 9 (mmol) |
|-------------|--------------------|--------------------------------------------------|-----------------------------------------------------------|
| MCT         | Tris               | $1.03 \pm 0.05$                                  | $3.00 \pm 0.39$                                           |
|             | NaTDC/DOPC in tris | $1.30 \pm 0.04$                                  | $3.94 \pm 0.35$                                           |
| LCT         | Tris               | $0.22 \pm 0.01$                                  | $1.16 \pm 0.05$                                           |
|             | NaTDC/DOPC in tris | $0.44 \pm 0.00$                                  | $1.42 \pm 0.11$                                           |
